# Supplementary material for: Temperature triggered antifouling properties of poly(vinylidene fluoride) graft copolymers with tunable hydrophilicity
Source: Royal Society of Chemistry journal article supplement (doi:10.1039/c5ta01306b), 2015-01-01
Supplement: c5ta01306b1.pdf [file c5ta01306b1.pdf]

**Temperature triggered antifouling property of Poly(vinylidene fluoride) graft copolymers  
with tunable hydrophilicity**

Atanu Kuila, Nabasmita Maity, Dhruva P. Chatterjee<sup>a</sup> and Arun K. Nandi\*

Polymer Science Unit, Indian Association for the Cultivation of Science, Jadavpur,  
Kolkata 700032, India, Fax: (+) 91 33 2473 2805

---

\*Correspondence to: A. K. Nandi (E-mail: [psuakn@iacs.res.in](mailto:psuakn@iacs.res.in))

[a] Present address: Department of Chemistry, Presidency University, Kolkata-700073

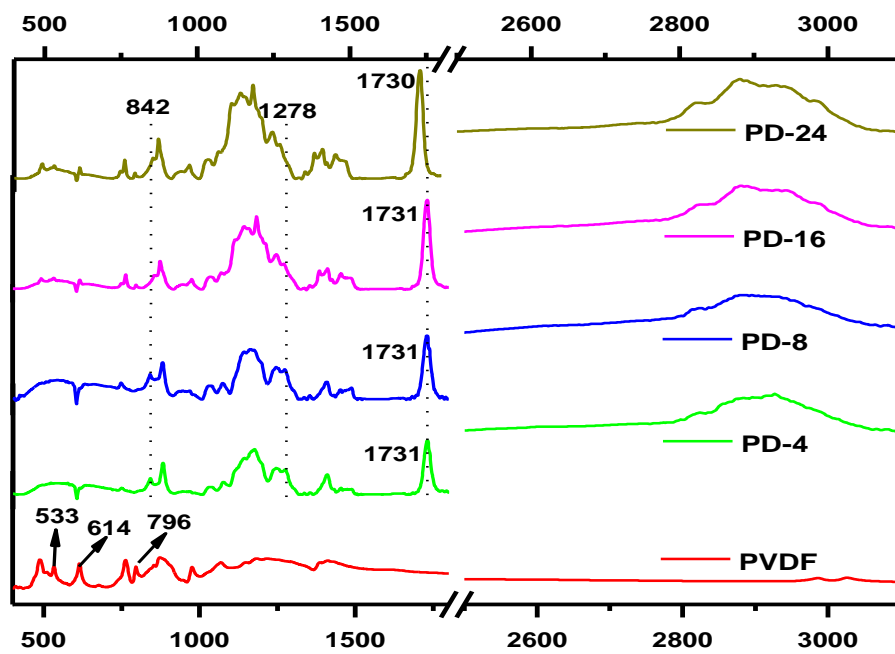

**Figure S1:** FTIR spectra of PVDF and different PD samples.

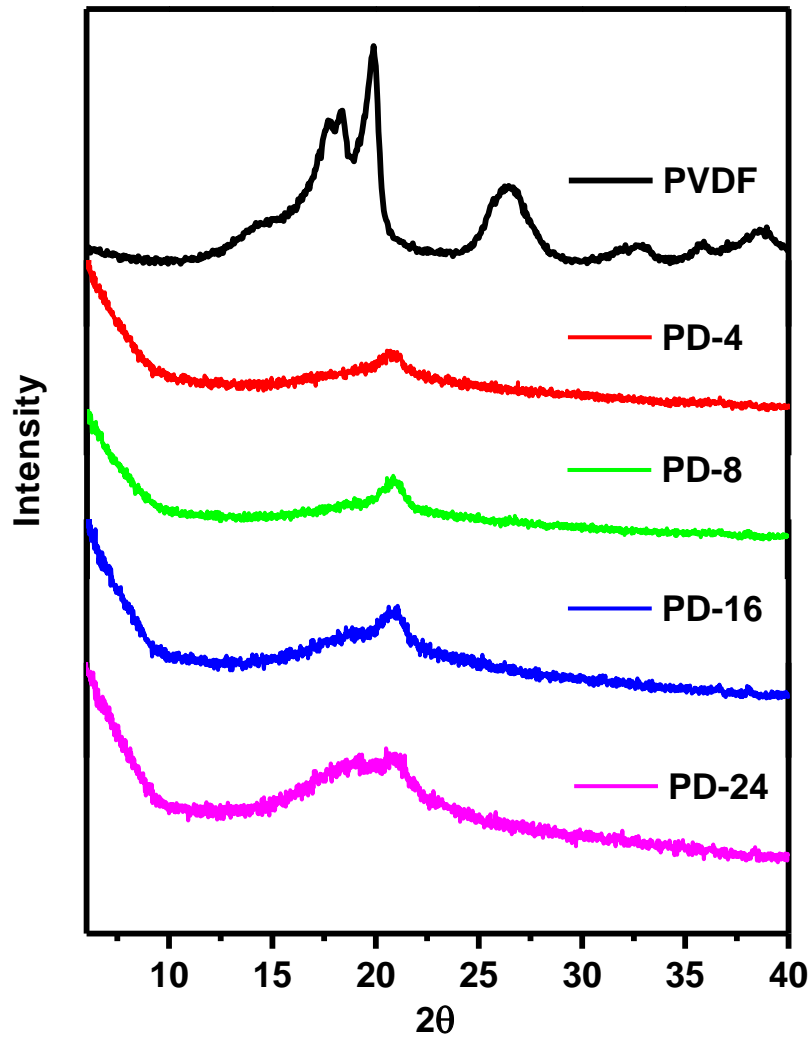

Figure S2: WAXS patterns of PVDF and PD graft copolymers.

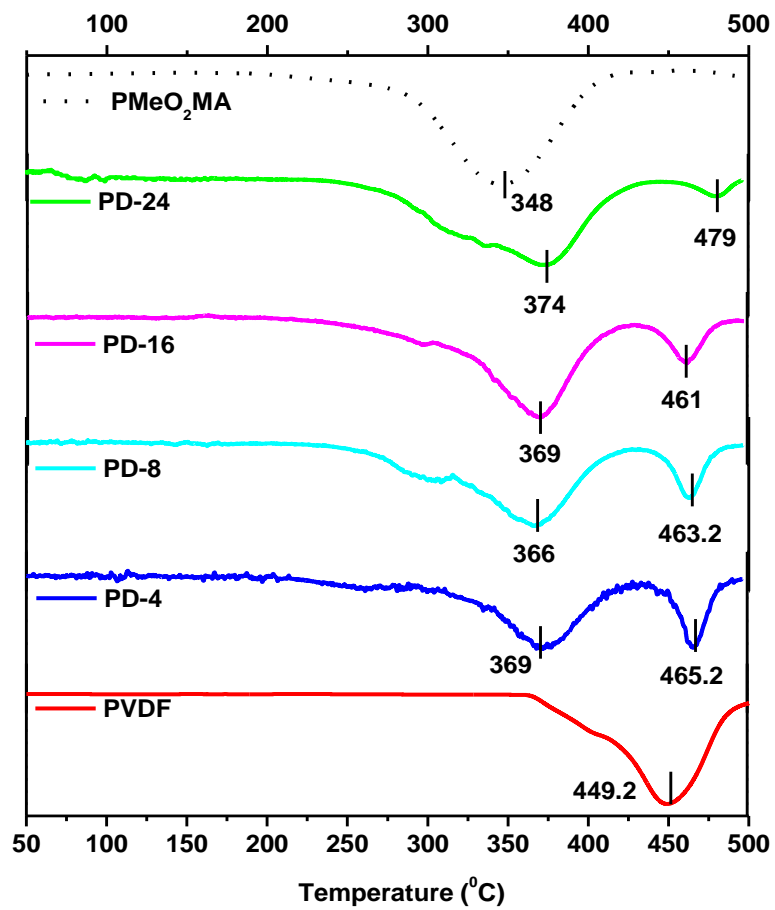

**Figure S3:** Derivatograms of TGA analysis of PVDF, different PD and PMeO<sub>2</sub>MA.

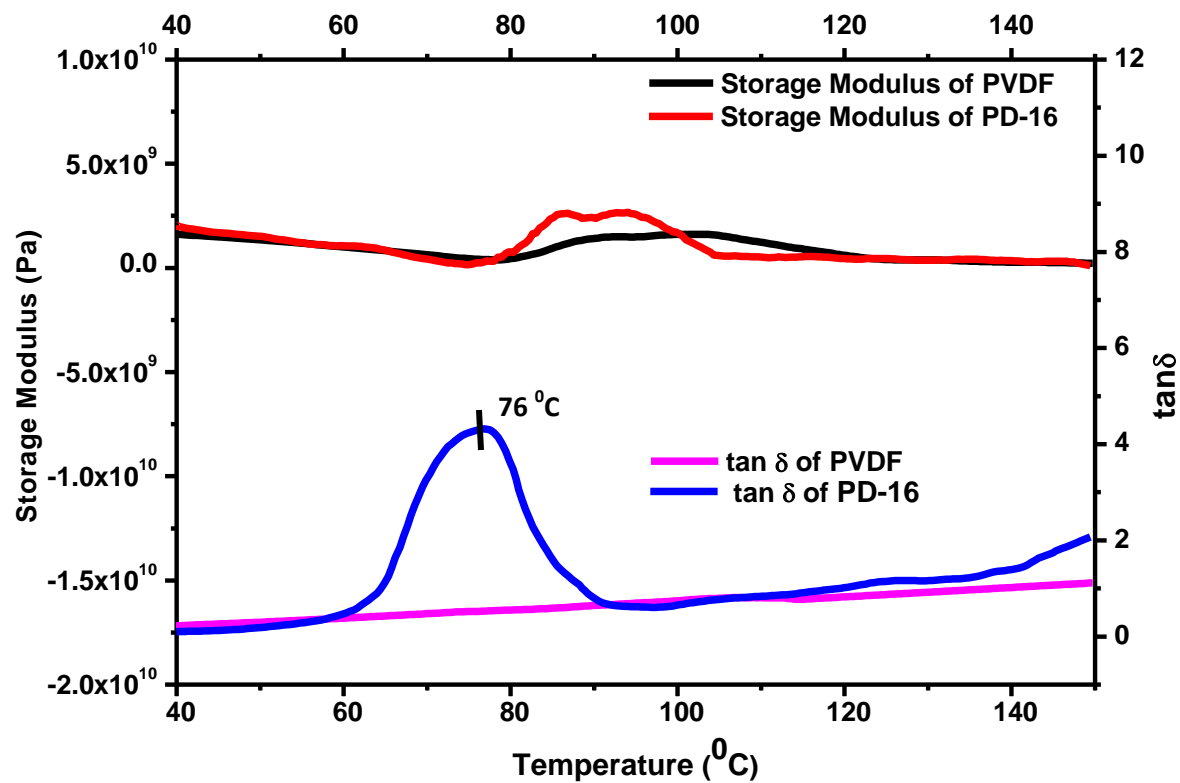

**Figure S4:** Dynamic mechanical property (storage modulus and  $\tan \delta$ ) vs. temperature plots of PVDF and PD-16 films.

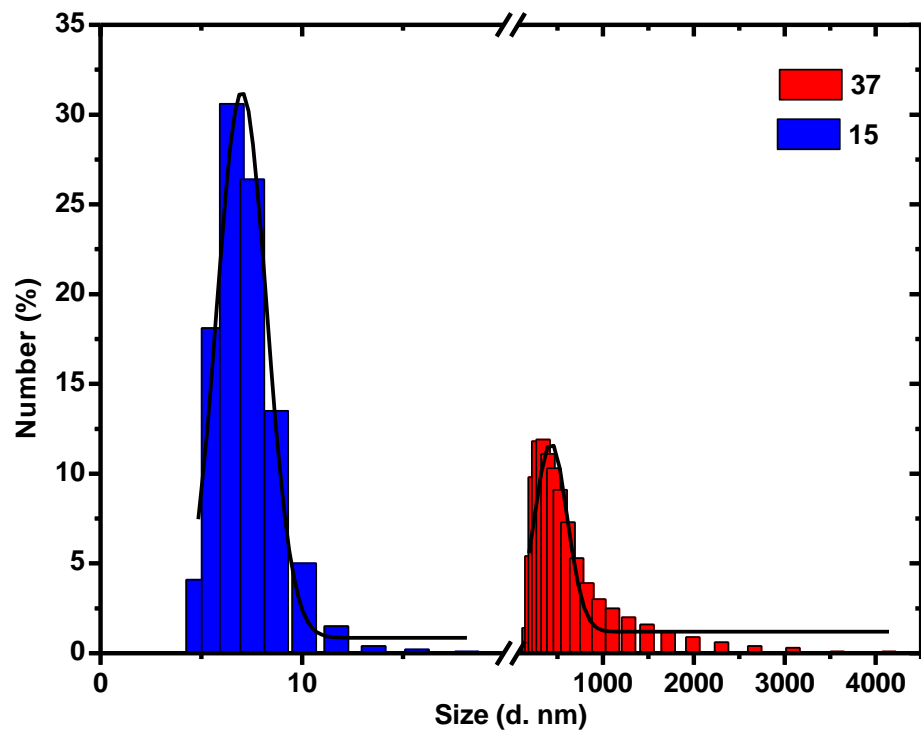

**Figure S5:** Number (%) vs. size distribution plot for PD-24 with Gaussian fit curves.

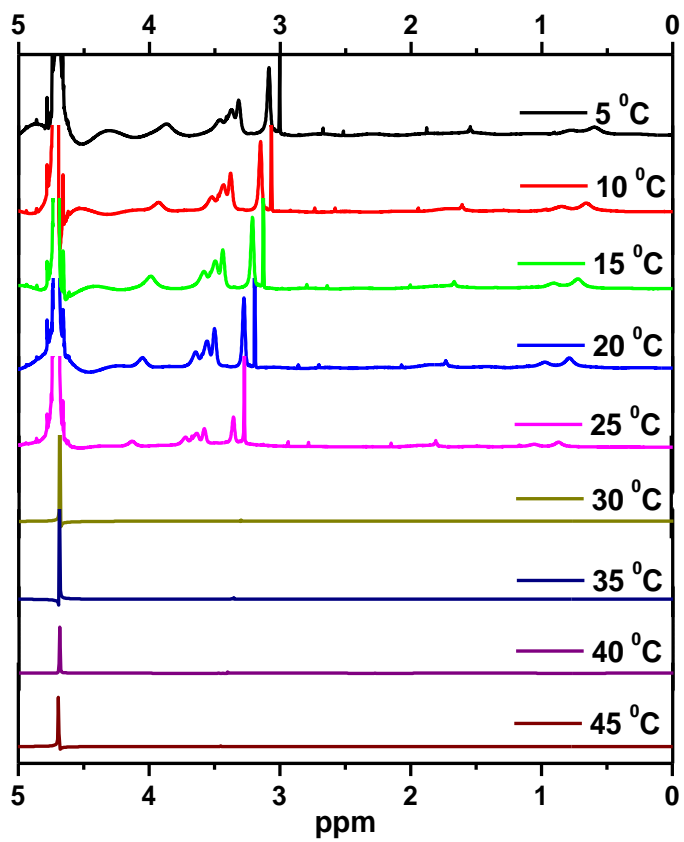

**Figure S6:** Temperature-dependent  $^1\text{H}$  NMR spectra of the PD-24 in  $\text{D}_2\text{O}$

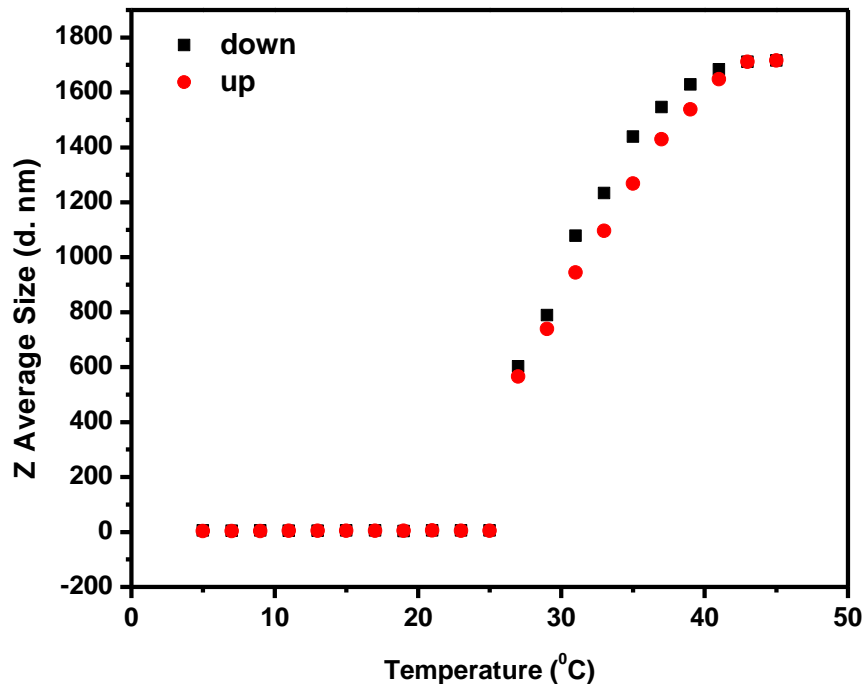

**Figure S7:** Z average size vs. temperature plot of PD-16 graft copolymer obtained from DLS study in aqueous solution (0.1%, w/v).

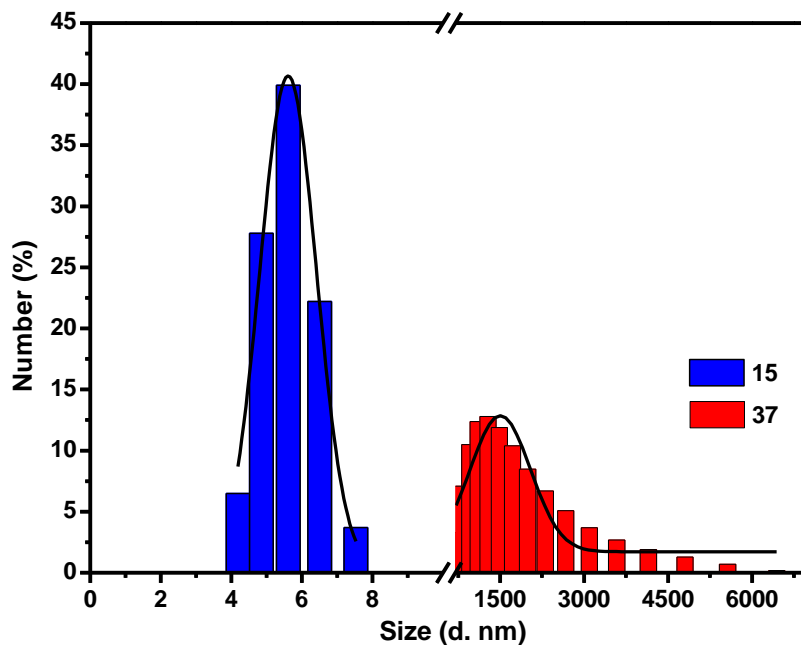

**Figure S8:** Number (%) vs. size distribution plot for PD-16 with Gaussian fit curves.



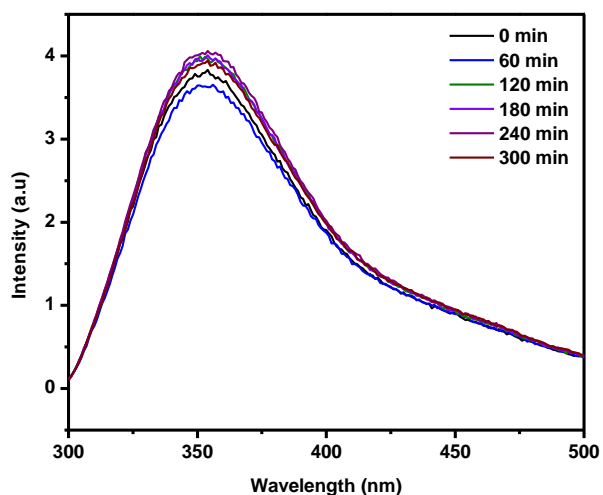

**Figure S9a:** Fluorescence spectra of BSA solution with time into which PVDF film is dipped.

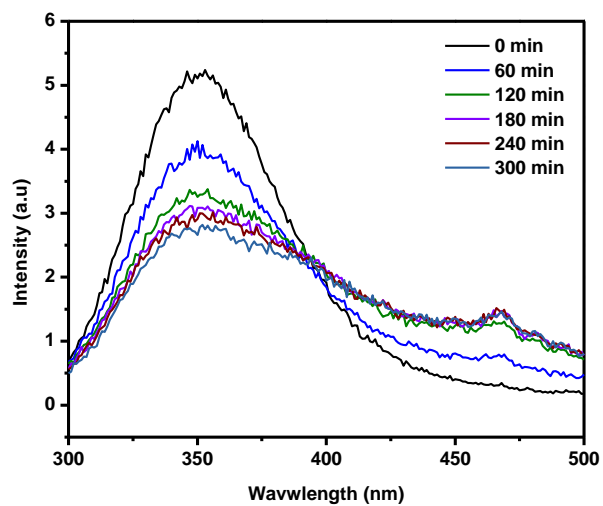

**Figure S9b:** Fluorescence spectra of BSA solution with time into which PD-24-15 film is dipped at 15 °C.

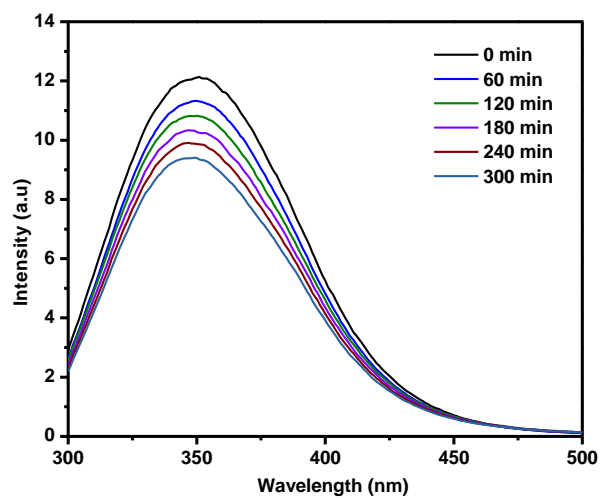

**Figure S9c:** Fluorescence spectra of BSA solution with time into which PD-24-37 film is dipped at 37 °C.

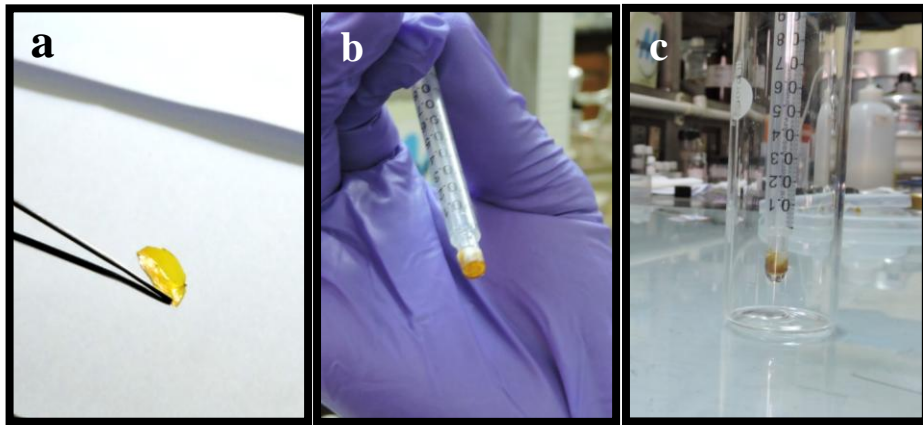

**Figure S10:** (a-c) Digital images of filtering set up for PD-24

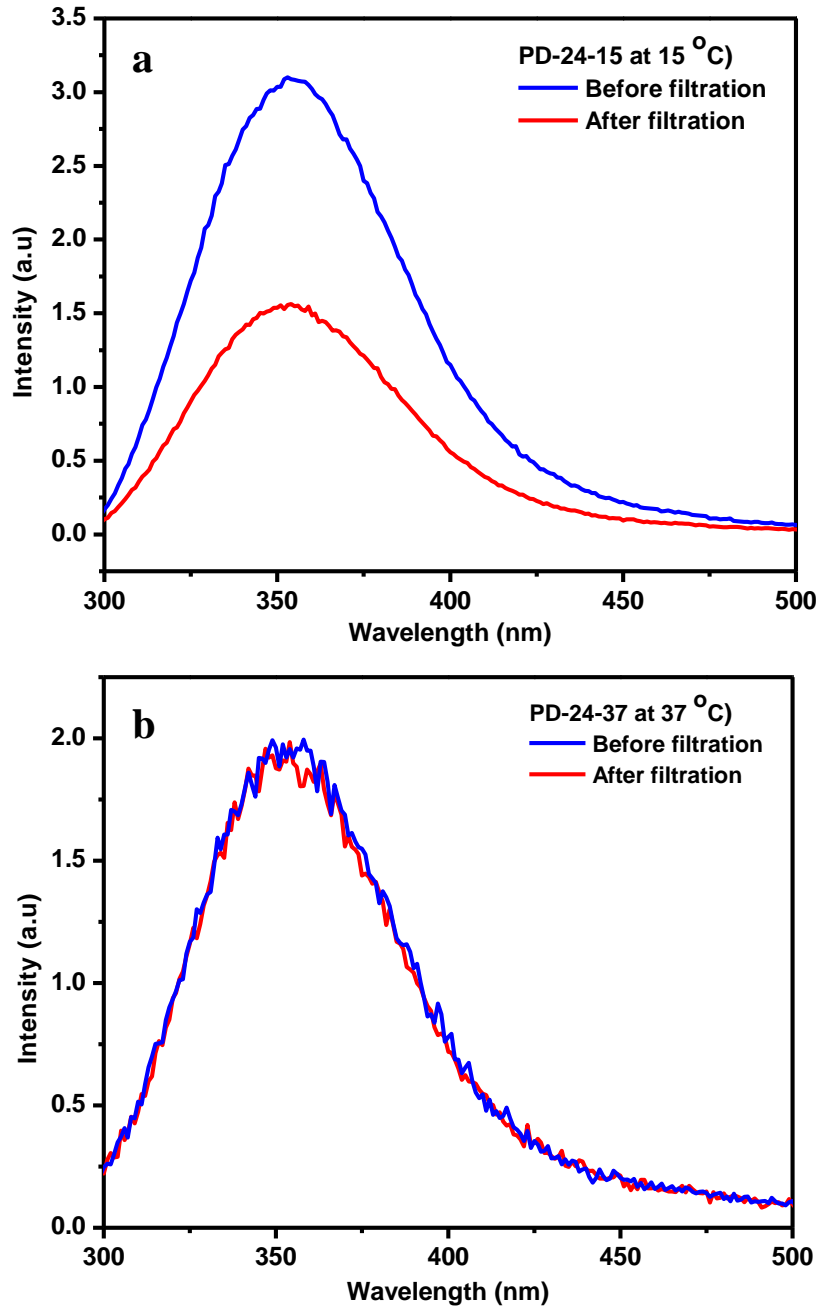

**Figure S11:** (a) Fluorescence spectra of BSA solution before and after filtration through PD-24-15 film at 15 °C and (b) through PD-24-37 film at 37 °C (filtration using the same membrane after storing at 30° for 10 days)

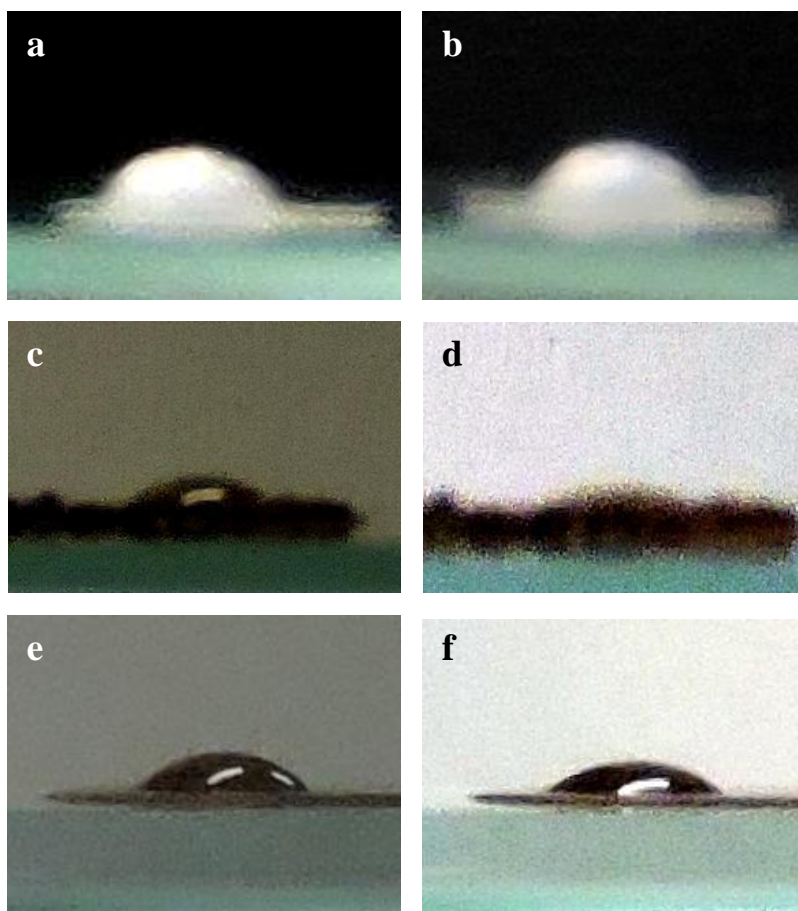

**Figure S12:** Digital images of side view of the water drops on (a) PVDF film at 0 min, (b) PVDF film after 2 min, (c) PD-24-15 film at 0 min, (d) PD-24-15 film after 2 min, (e) PD-24-37 film at 0 min and (f) PD-24-37 film after 2 min.
